# Supplementary material for: Rosmarinic Acid Methyl Ester Inhibits LPS-Induced NO Production via Suppression of MyD88- Dependent and -Independent Pathways and Induction of HO-1 in RAW 264.7 Cells
Source: PubMed Central journal article supplement (PMC6274143; doi:10.3390/molecules21081083), 2016-08-18
Supplement: molecules-21-01083-s001.pdf [file molecules-21-01083-s001.pdf]

# Supplementary Materials: Rosmarinic Acid Methyl Ester Inhibits LPS-Induced NO Production via Suppression of MyD88- Dependent and -Independent Pathways and Induction of HO-1 in RAW 264.7 Cells

Yangkang So, Seung Young Lee, Ah-Reum Han, Jin-Baek Kim, Hye Gwang Jeong and Chang Hyun Jin

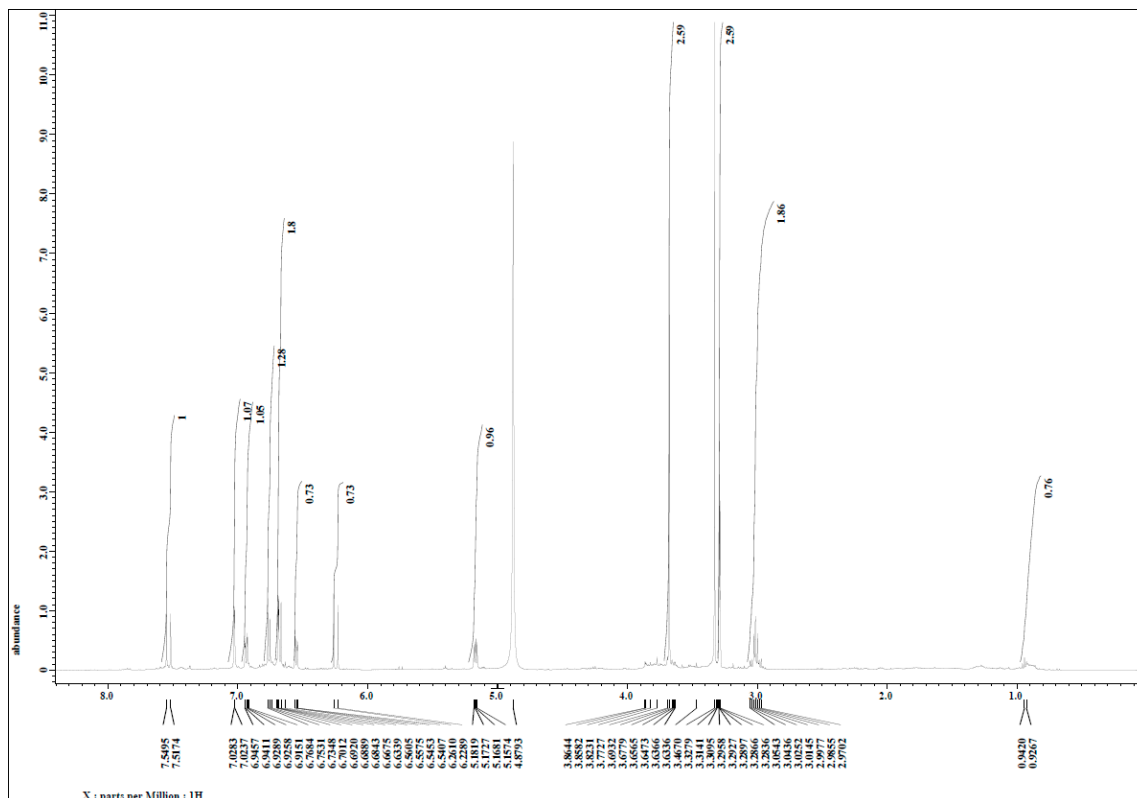

Figure S1. <sup>1</sup>H-NMR (500 MHz, CD<sub>3</sub>OD) spectrum of rosmarinic acid methyl ester (RAME).
